# Supplementary material
Source: Research Square preprint supplement (doi:10.21203/rs.3.rs-9055552/v1)
Supplement: Supplementary file 1 [file Figure1.pdf › tensor-group-sym-main/latex/figures/Figure1.pdf]

# The $\star_G$ tensor algebra: from optimal decomposition to symmetry discovery

## From molecules to (tensor) algebra

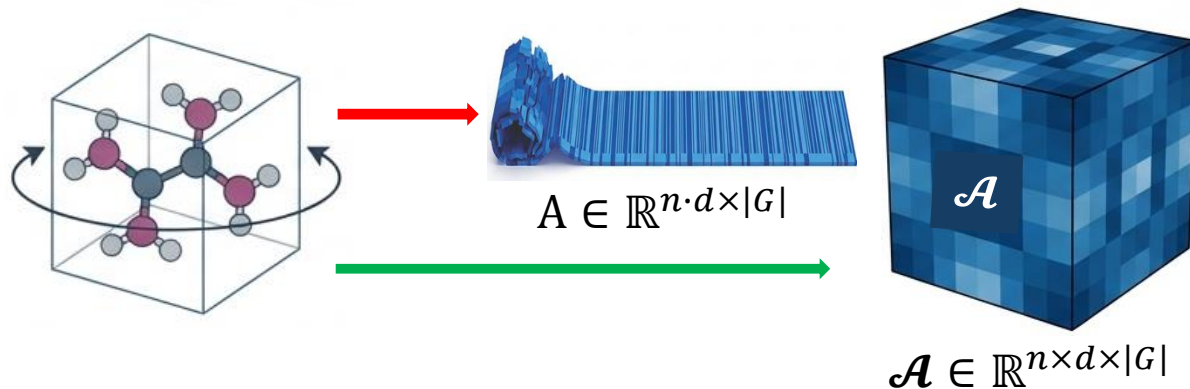

Data vectorization leads to loss of structural information

## The $\star_G$ product

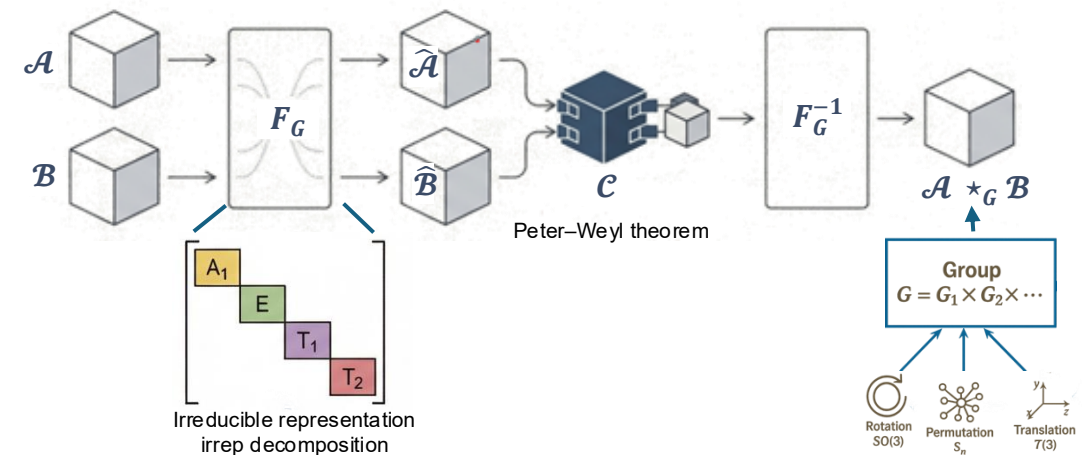

Symmetry is in the algebra, not the architecture

## The $\star_G$ -SVD and irreducible representation decomposition

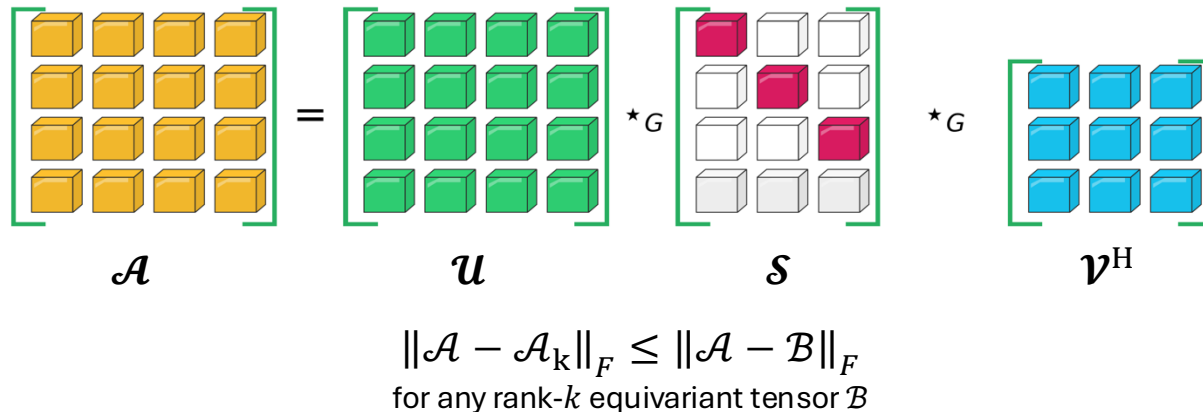

Provably Optimal low rank compression

## From Eckart-Young to Wigner-Eckart

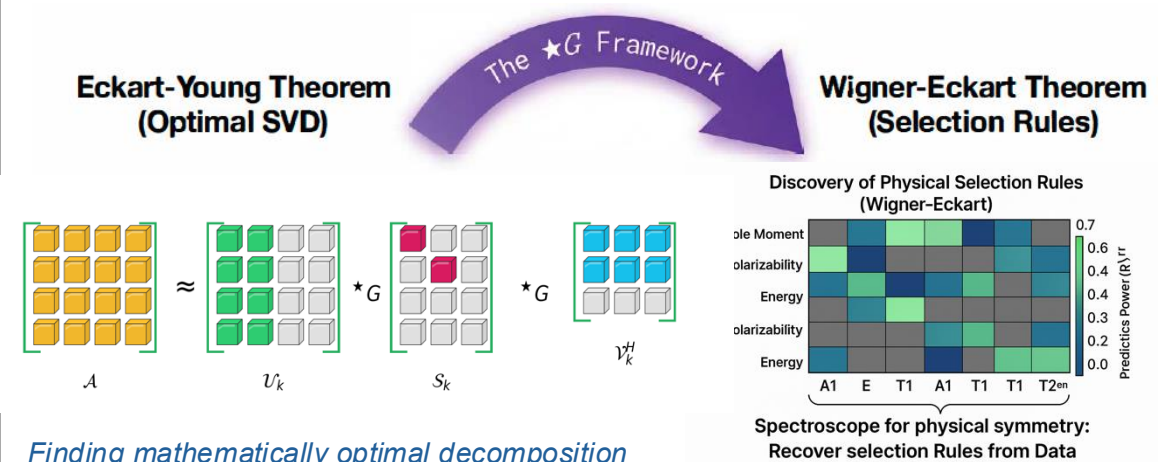

Finding mathematically optimal decomposition (Eckart-Young) led to inadvertently recovering the physical selection rules (Wigner-Eckart)
