# Supplementary material
Source: Research Square preprint supplement (doi:10.21203/rs.3.rs-9055552/v1)
Supplement: Supplementary file 2 [file Figure1_2.pdf › tensor-group-sym-main/latex/figures/Figure1_2.pdf]

# The $\star_G$ tensor algebra: from optimal decomposition to symmetry discovery

## From molecules to (tensor) algebra

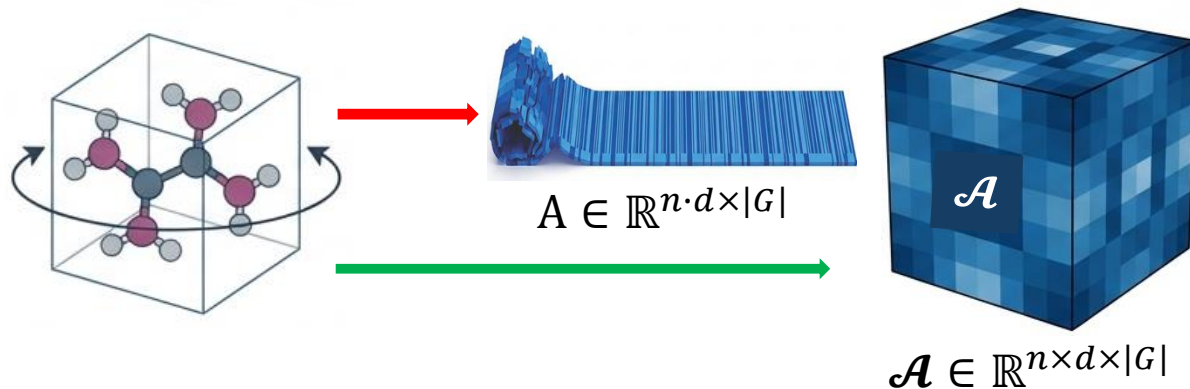

Data vectorization leads to loss of structural information

## The $\star_G$ product

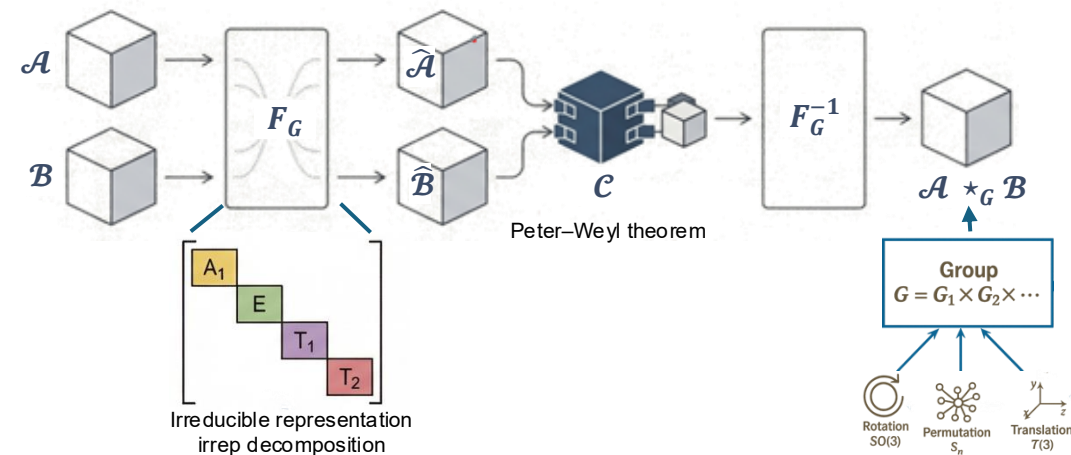

Symmetry is in the algebra, not the architecture

## The $\star_G$ -SVD and irreducible representation decomposition

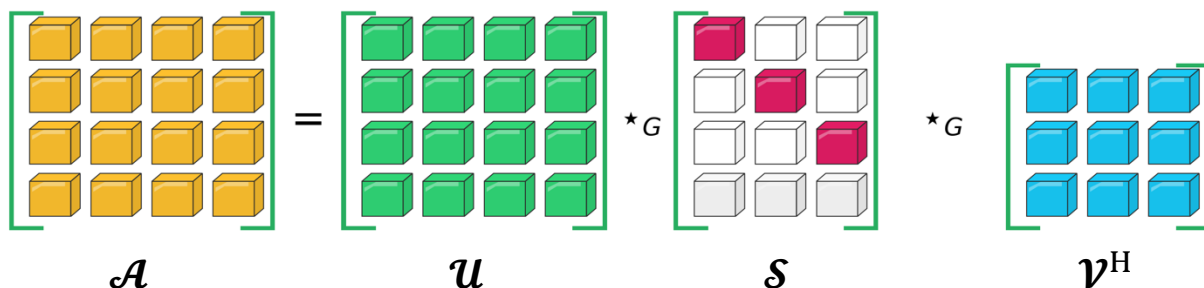

$$\|\mathcal{A} - \mathcal{A}_k\|_F \leq \|\mathcal{A} - \mathcal{B}\|_F$$

for any rank- $k$  equivariant tensor  $\mathcal{B}$

Provably Optimal low rank compression

## From Eckart–Young to Wigner–Eckart

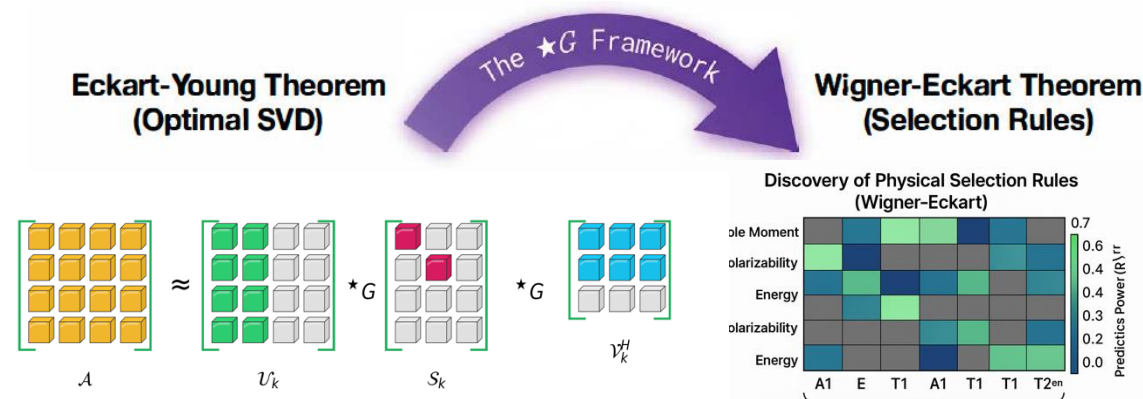

Finding mathematically optimal decomposition (Eckart-Young) led to inadvertently recovering the physical selection rules (Wigner-Eckart)

Spectroscopy for physical symmetry:  
Recover selection Rules from Data
