# Supplementary material
Source: Research Square preprint supplement (doi:10.21203/rs.3.rs-9055552/v1)
Supplement: Supplementary file 12 [file fig6_paradigm.pdf › tensor-group-sym-main/latex/figures/fig6_paradigm.pdf]

## ENN Paradigm Comparison: Architecture vs Algebra

Rotation symmetry:  
Design SE(3)-equivariant layers

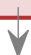

Permutation symmetry:  
Design set-equivariant layers

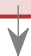

Both symmetries:  
Redesign architecture from scratch ???

*Each symmetry = new architecture*

**\star\_G Algebra**  
(SVD, Ridge, features)

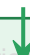

Rotation:  $G = \mathbb{Z}_{12}$

Permutation:  $G = S_n$

Both:  $G = \mathbb{Z}_{12} \times S_n$

*Same algebra, just specify the group*
