# Supplementary material
Source: Research Square preprint supplement (doi:10.21203/rs.3.rs-9055552/v1)
Supplement: Supplementary file 14 [file fig_paradigm.pdf › tensor-group-sym-main/latex/figures/fig_paradigm.pdf]

# Paradigm Comparison: Architecture vs Algebra

## ENN Paradigm

Rotation symmetry:  
Design SE(3)-equivariant layers

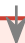

Permutation symmetry:  
Design set-equivariant layers

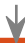

**Both symmetries:**  
**Redesign architecture from scratch ???**

*Each symmetry = new architecture*

## Star-G Paradigm

**Star-G Algebra**  
**(SVD, Ridge, features)**

Rotation   $G = Z_{12}$

Permutation:  $G = S_n$

Both:  $G = Z_{12} \times S_n$

*Same algebra, just specify the group*
