# Supplementary material
Source: Research Square preprint supplement (doi:10.21203/rs.3.rs-9055552/v1)

# Parameter-efficiency vs predictive power on QM9 gap

(a) Pooled  $R^2$ : advertised QM9 score

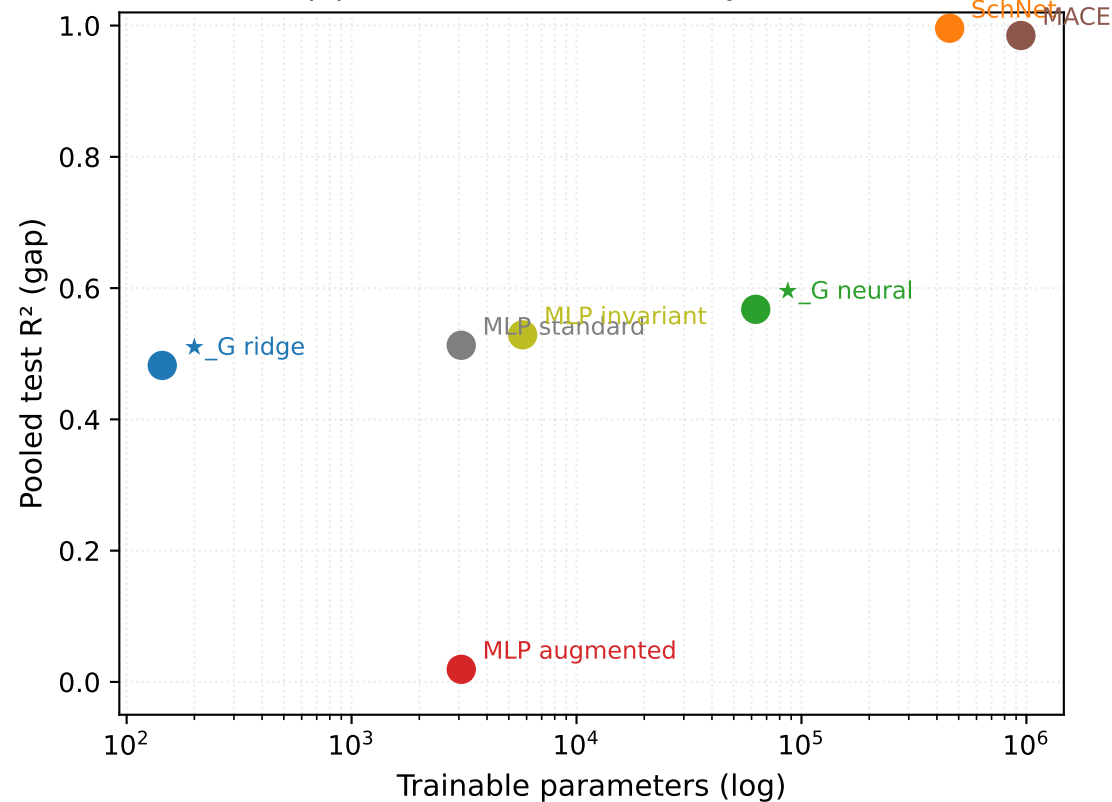

(b) Within-isomer  $R^2$ : size-prediction signal removed

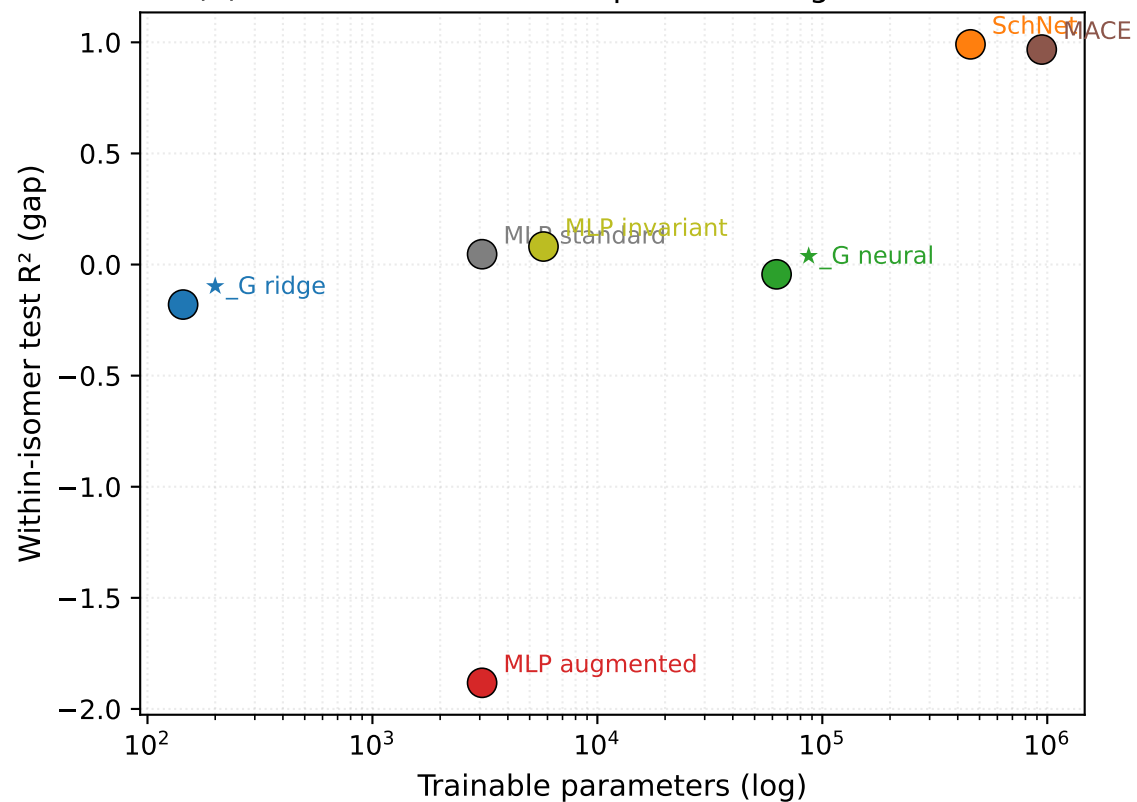

Supplement: Supplementary file 21 [file pareto_gap.pdf › tensor-group-sym-main/latex/figures/pareto_gap.pdf]
