# Supplementary material
Source: Research Square preprint supplement (doi:10.21203/rs.3.rs-9055552/v1)

Learned Fourier Basis Distances Across Properties

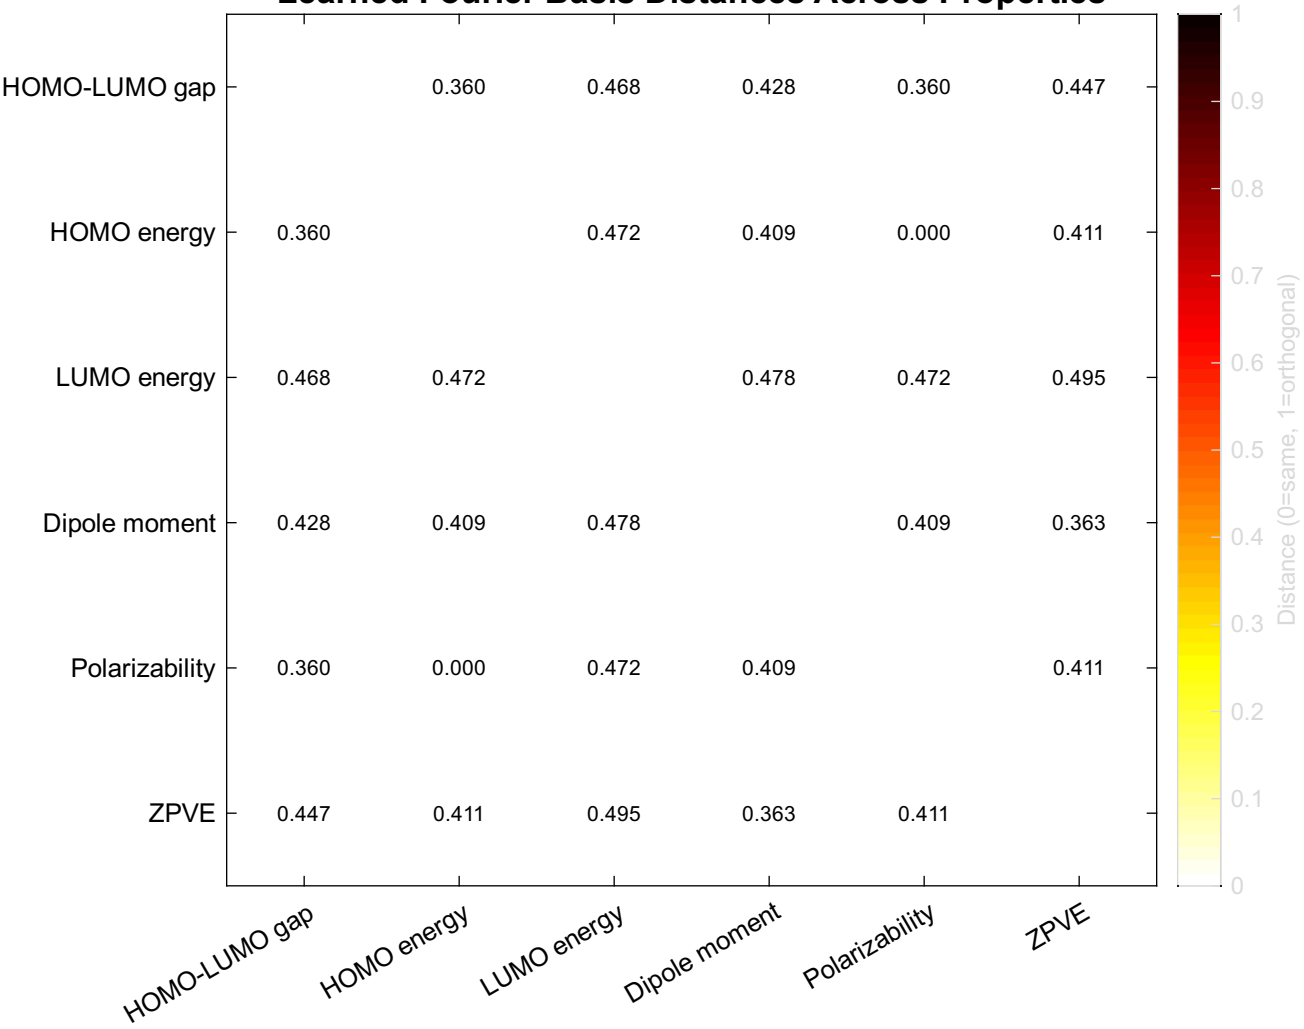

Supplement: Supplementary file 3 [file basis_distances.pdf › tensor-group-sym-main/latex/figures/basis_distances.pdf]

# Synthetic Validation ( $Z_{12}$ , 1,000 molecules)

**a**

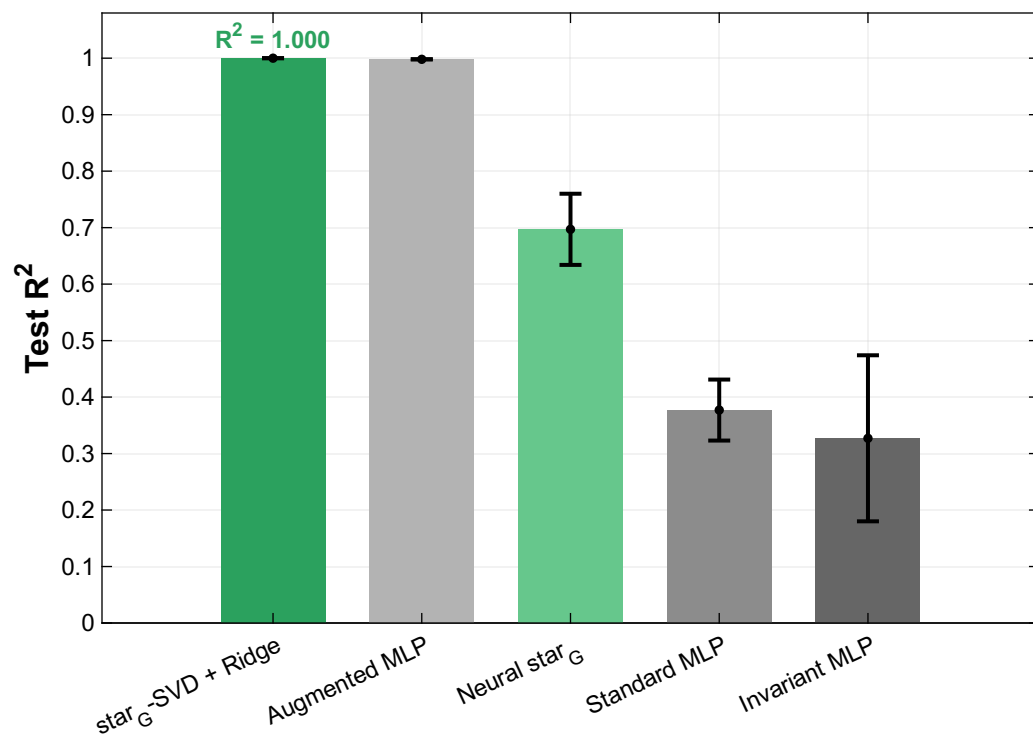

$\log_{10}(\text{Rotation Variance})$

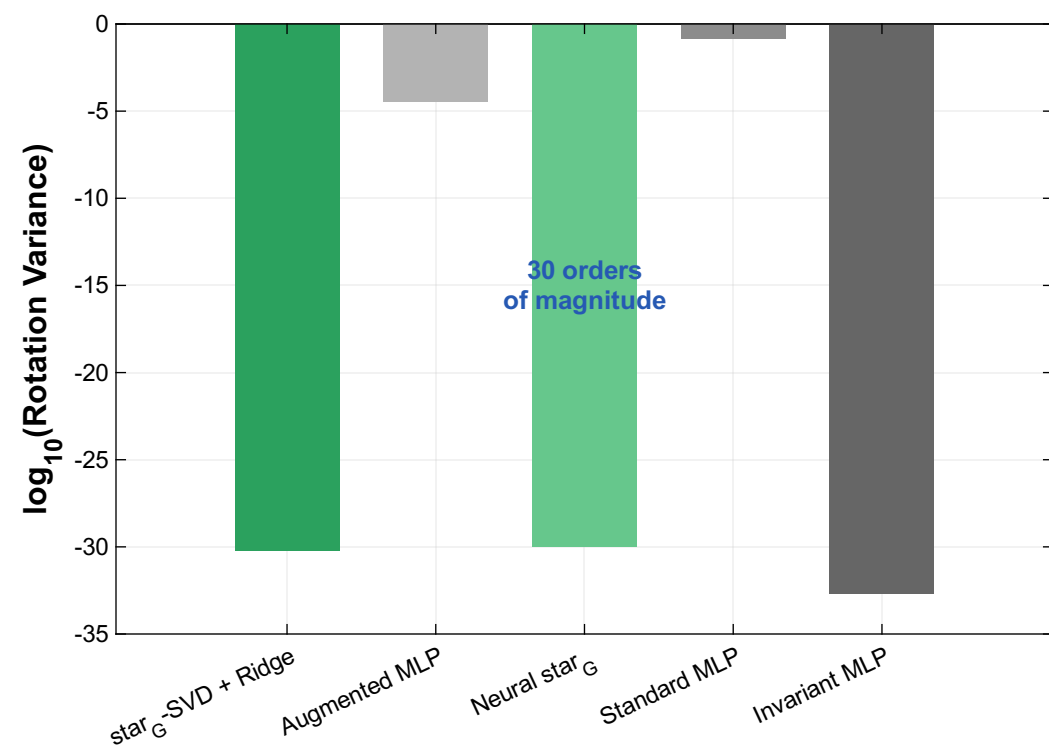

**c**

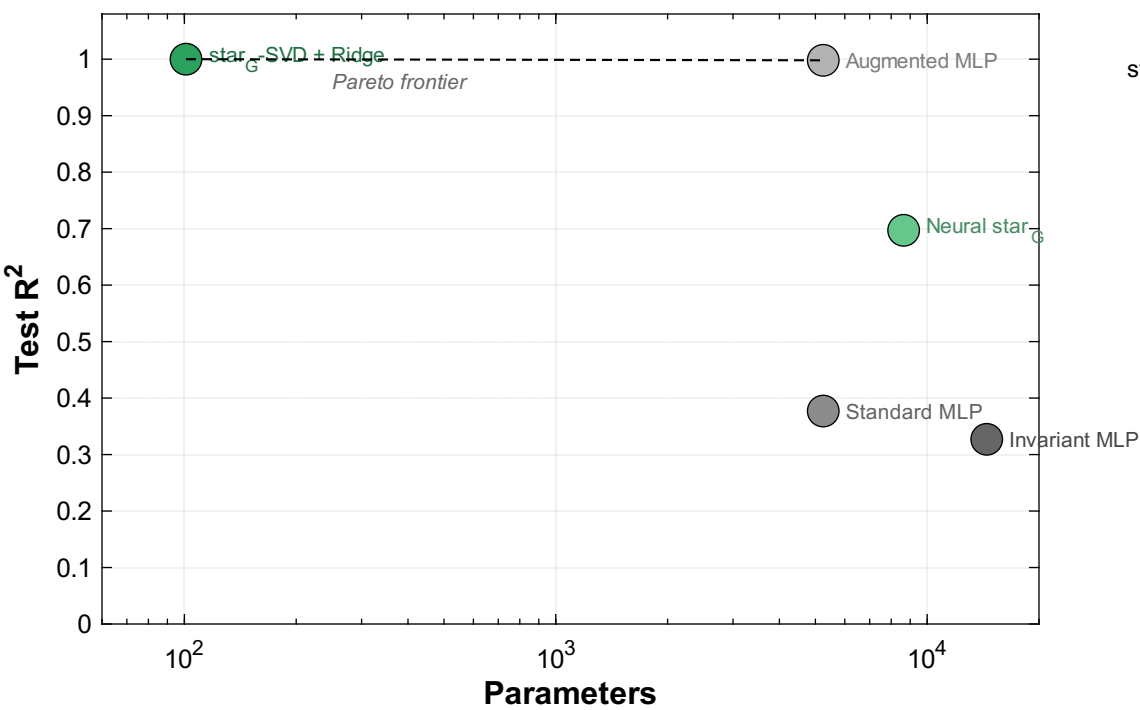

**d**

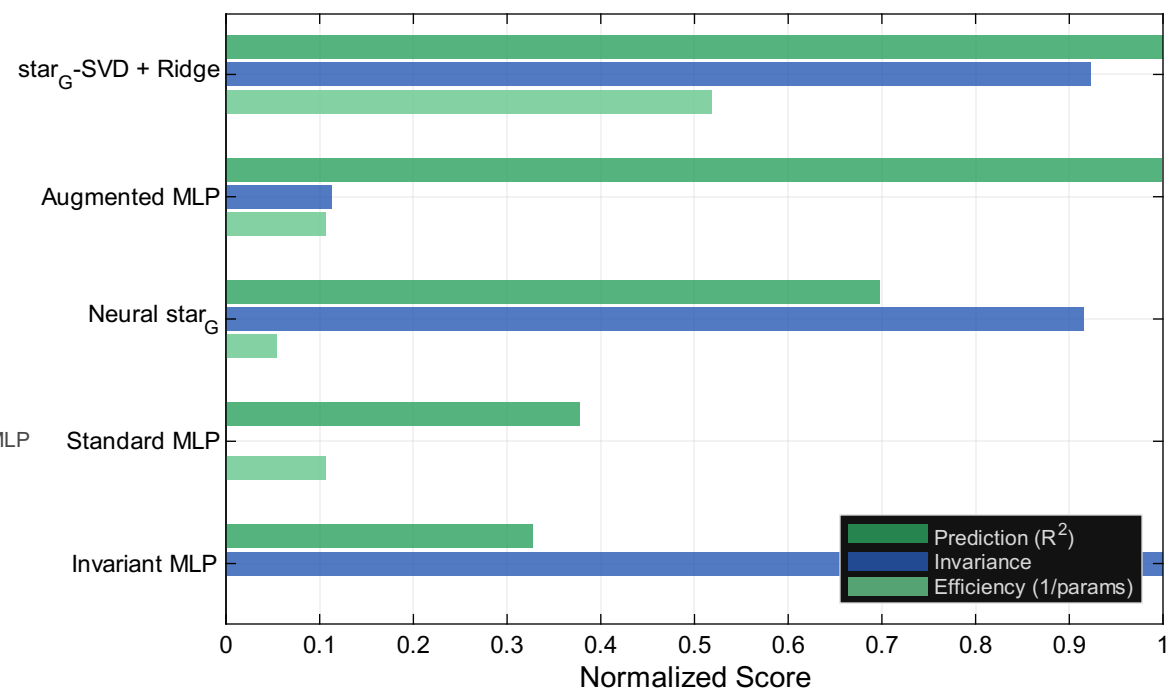

Supplement: Supplementary file 4 [file fig2_synthetic.pdf › tensor-group-sym-main/latex/figures/fig2_synthetic.pdf]

# Predicted vs True: Synthetic Validation

a \star\_G-SVD + Ridge ( $R^2 = 1.000$ )

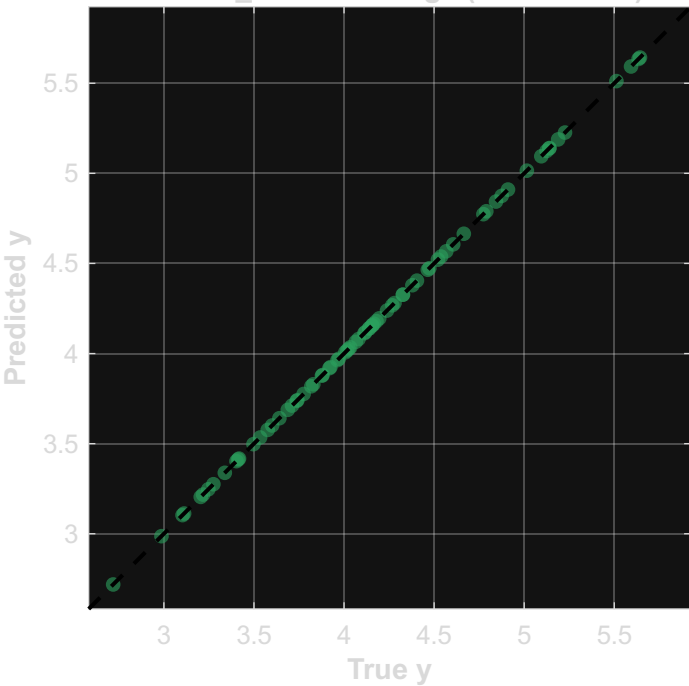

b Standard MLF

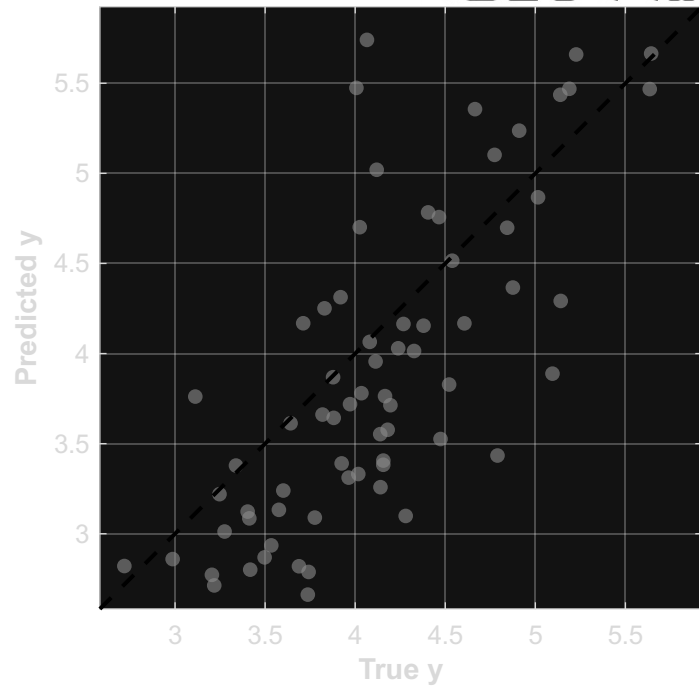

Supplement: Supplementary file 5 [file fig2b_scatter.pdf › tensor-group-sym-main/latex/figures/fig2b_scatter.pdf]

# QM9 HOMO-LUMO Gap (1,000 real molecules)

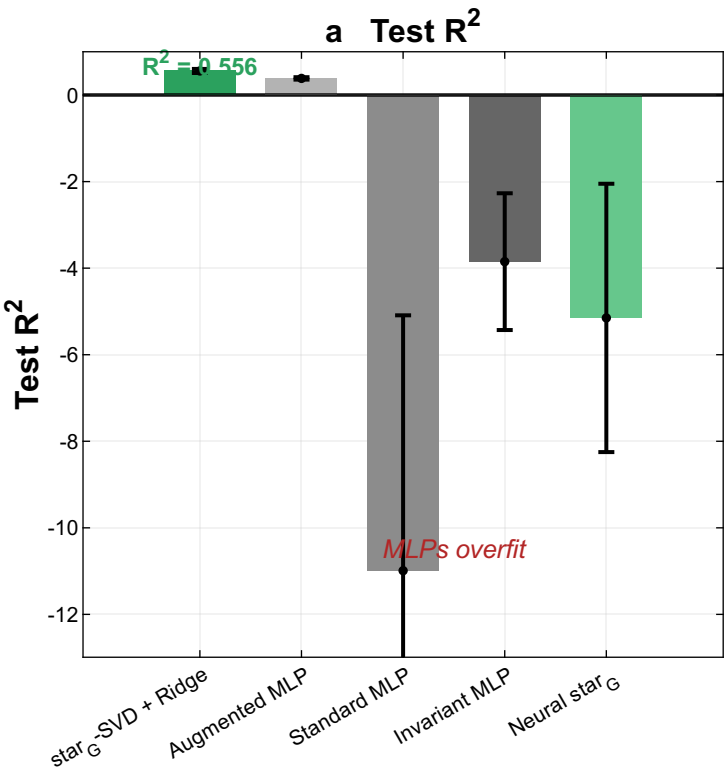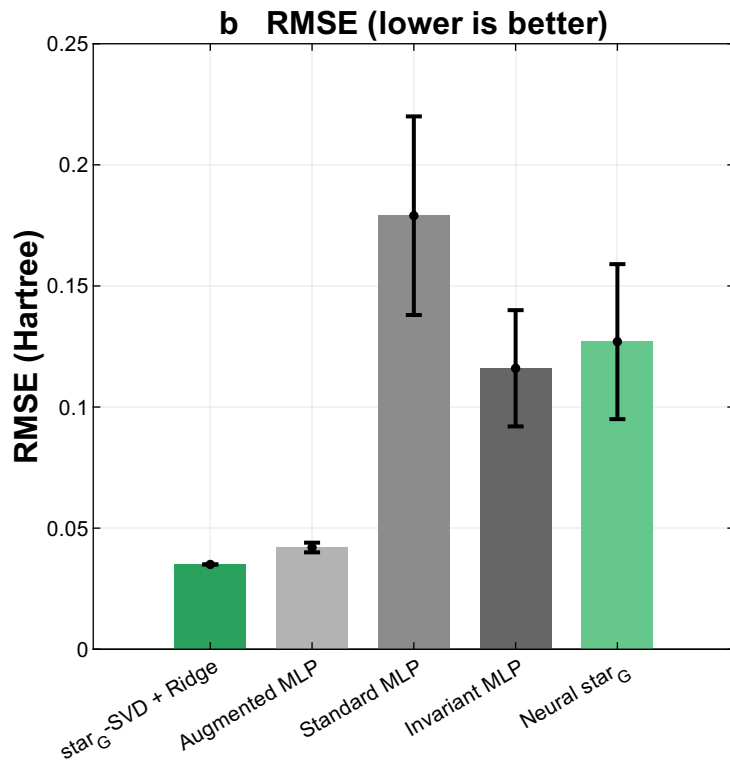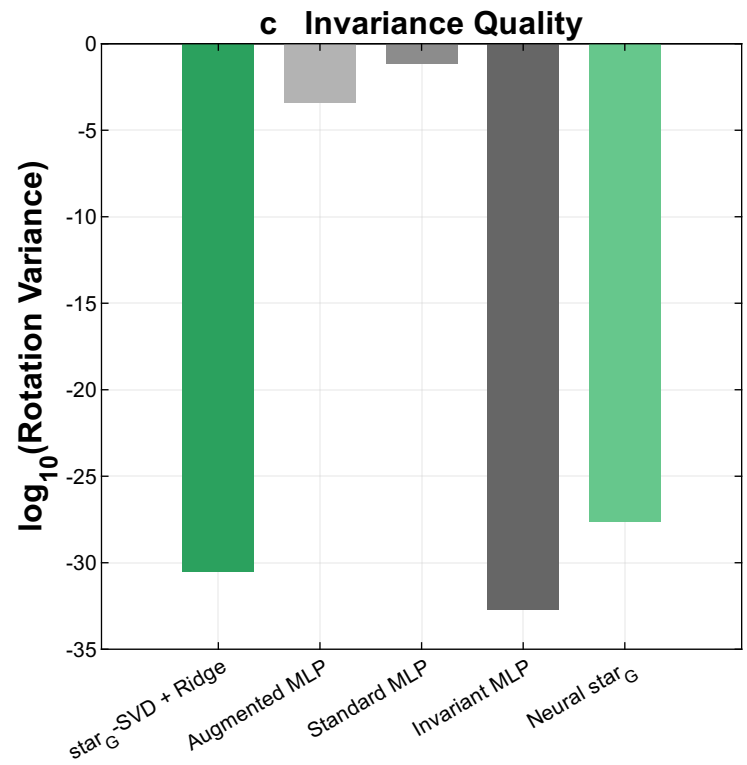

Supplement: Supplementary file 6 [file fig3_qm9.pdf › tensor-group-sym-main/latex/figures/fig3_qm9.pdf]

Learning Curves:  $R^2$  vs Sample Size

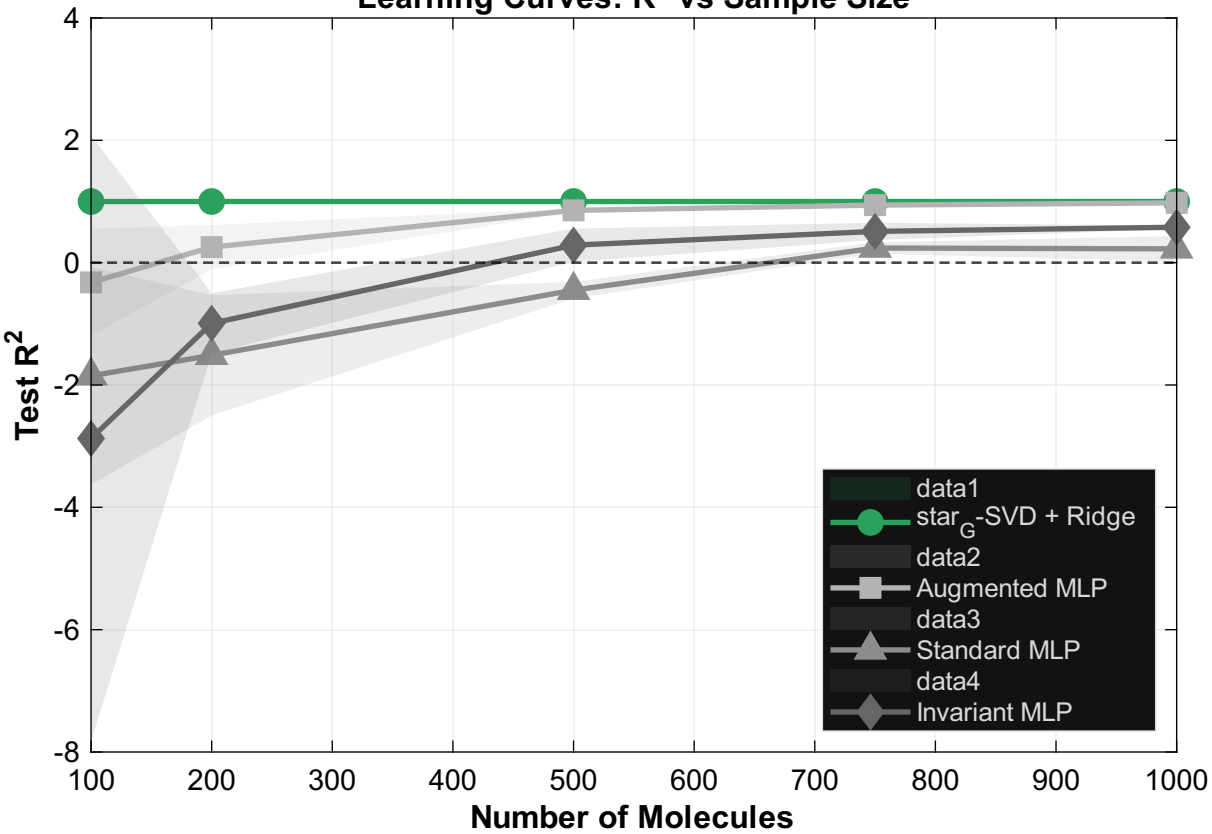

Supplement: Supplementary file 7 [file fig3d_learning_curves.pdf › tensor-group-sym-main/latex/figures/fig3d_learning_curves.pdf]

# Product Group $Z_6 \times Z_4$ : Compositional Advantage

**a Method Comparison**

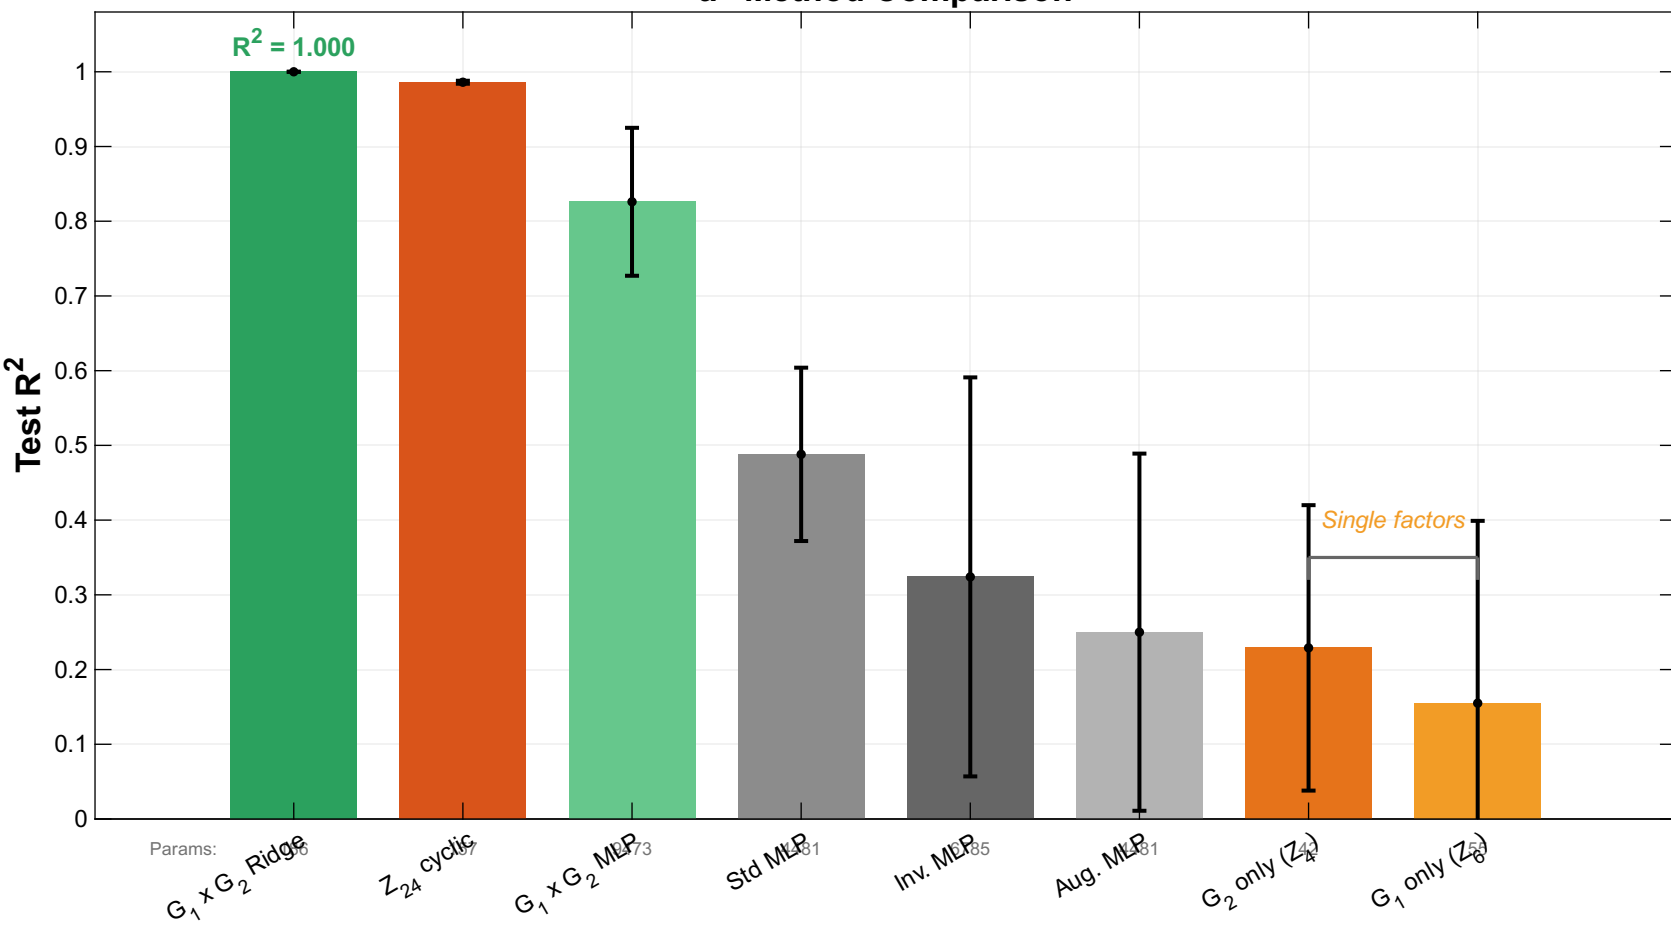

**b 2D Frequency Map**

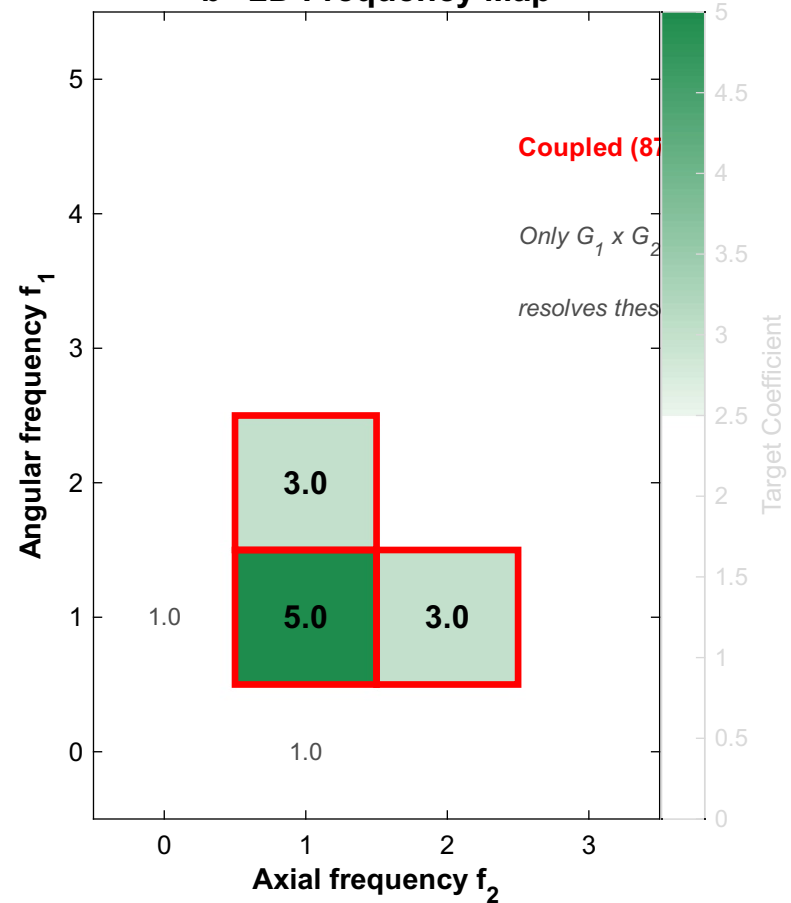

Supplement: Supplementary file 8 [file fig4_product.pdf › tensor-group-sym-main/latex/figures/fig4_product.pdf]

# Product Group $Z_6 \times Z_4$ : Compositional Advantage

a Method Comparison

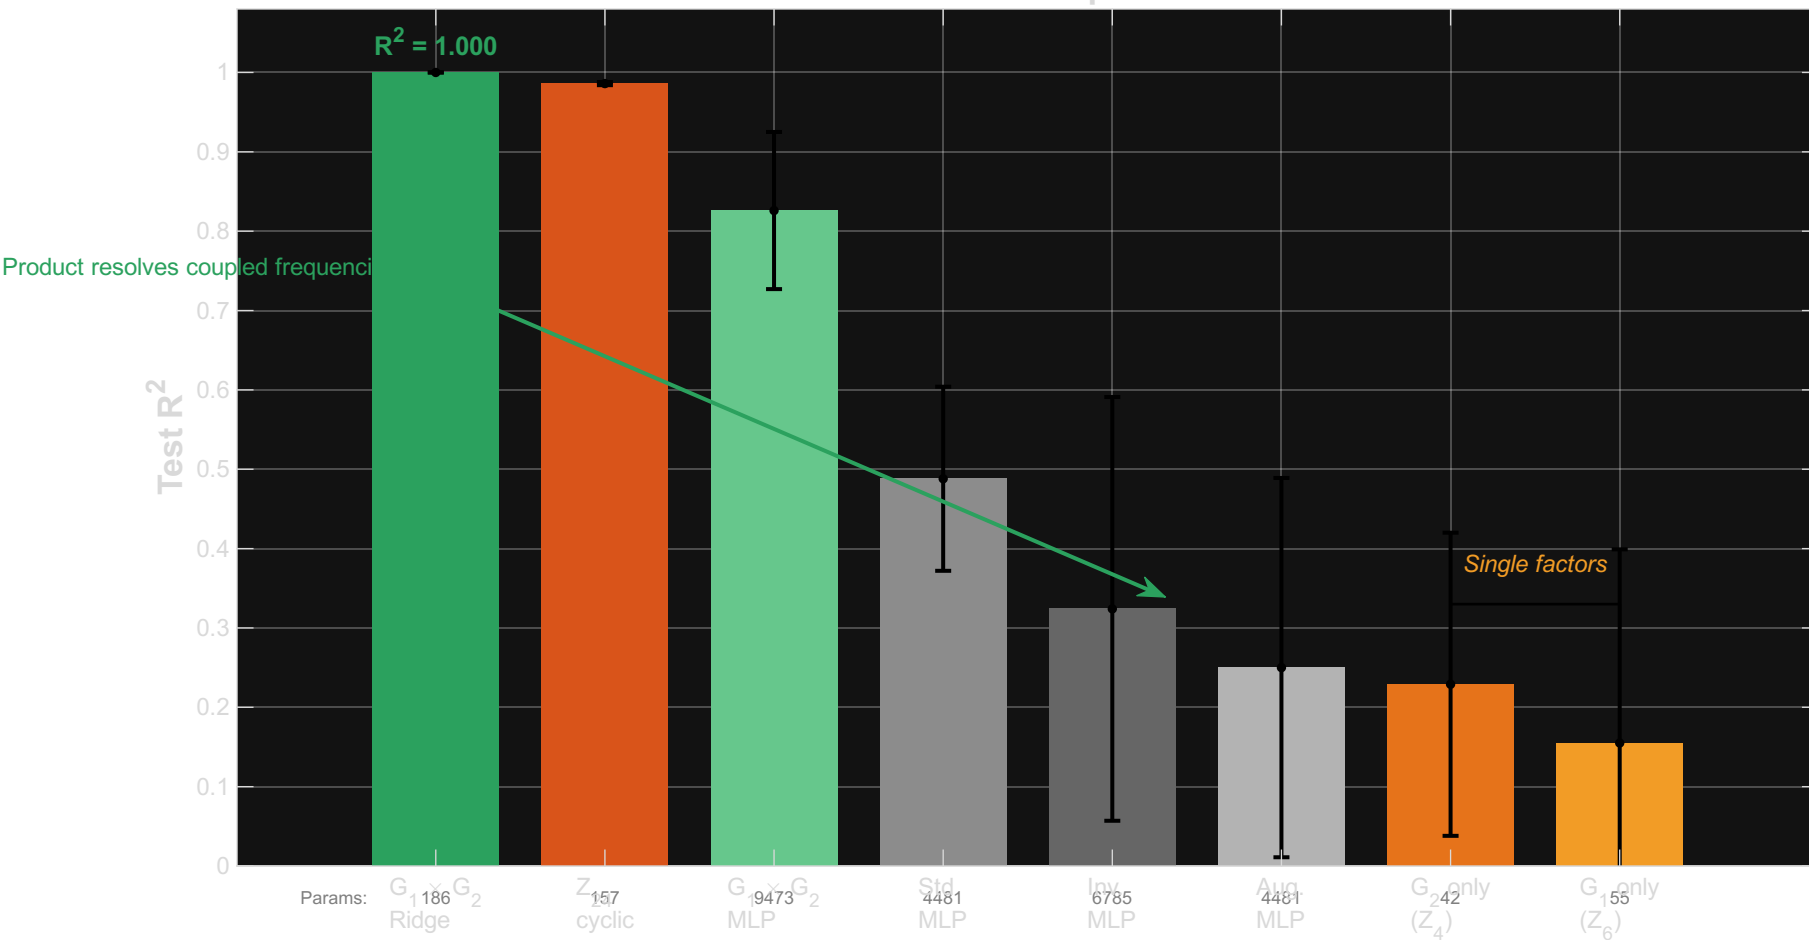

b 2D Frequency Map

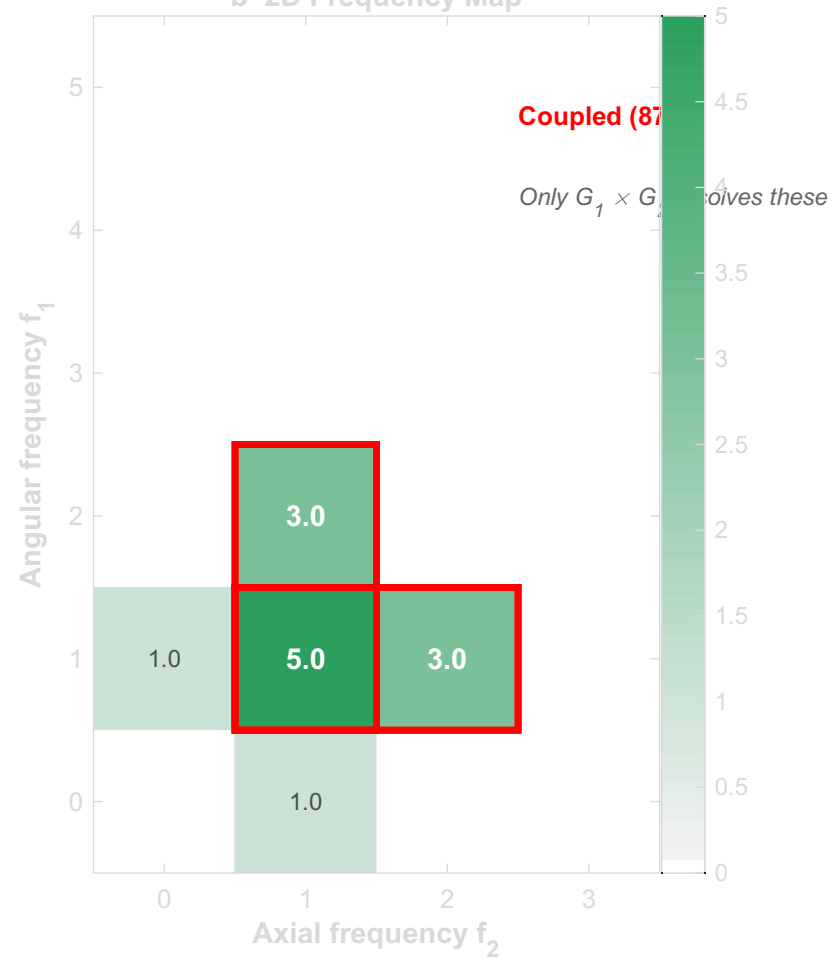

Supplement: Supplementary file 9 [file fig4_product_group.pdf › tensor-group-sym-main/latex/figures/fig4_product_group.pdf]

# Ablation: Removing Symmetry Components

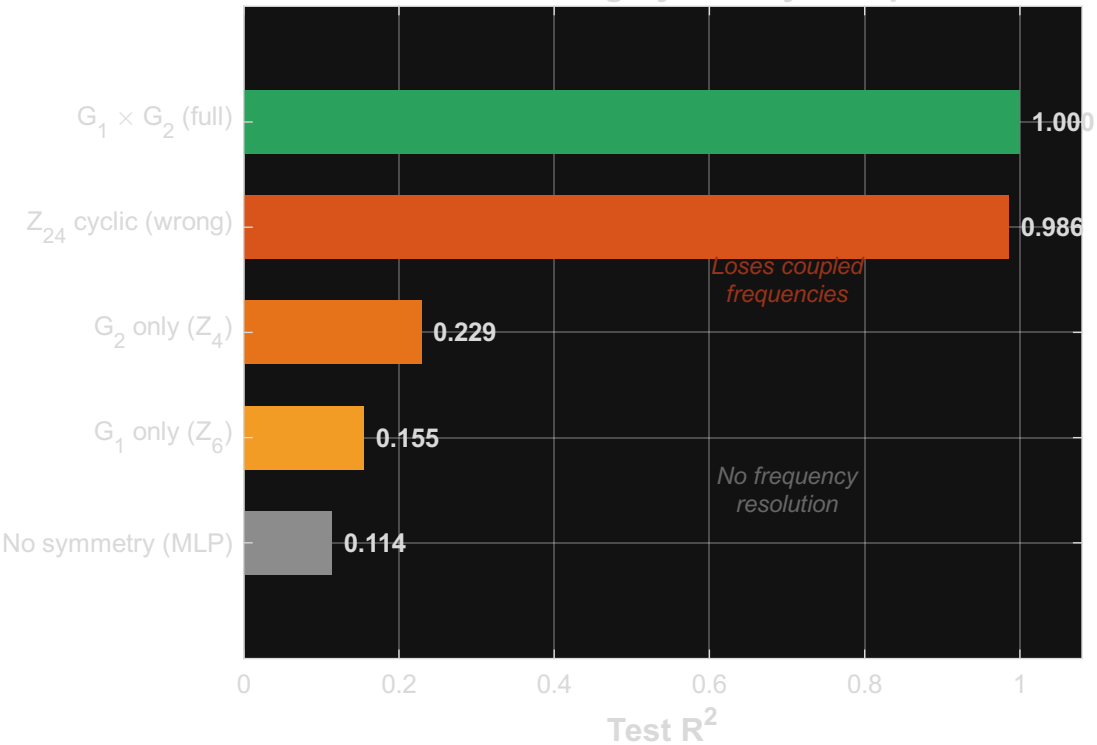

Supplement: Supplementary file 10 [file fig4c_ablation.pdf › tensor-group-sym-main/latex/figures/fig4c_ablation.pdf]

# Data-Driven Symmetry Discovery

## a QM9 Group Discovery

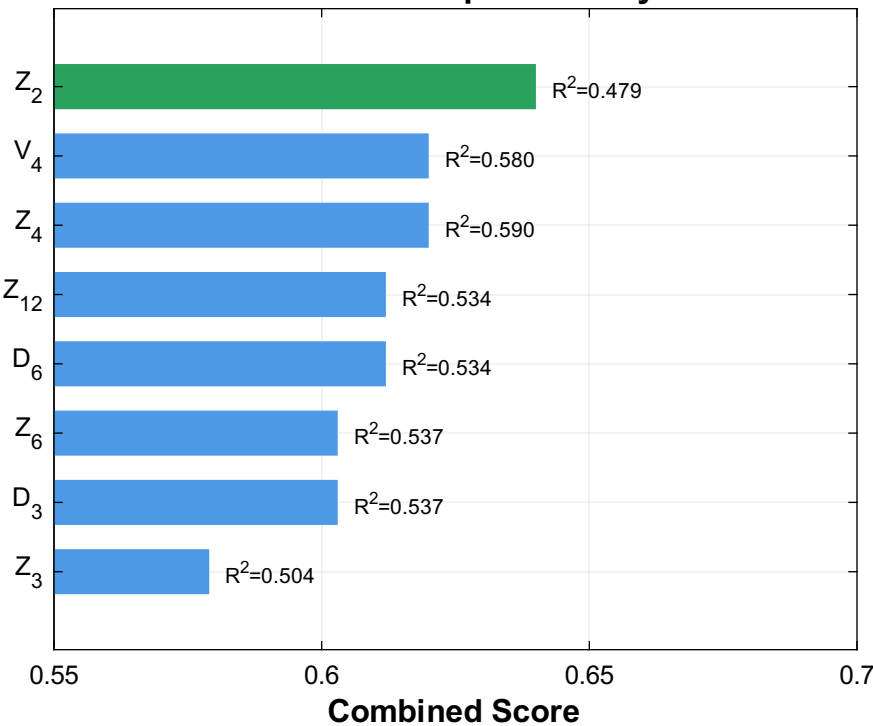

## b Factorization Discovery (n=24)

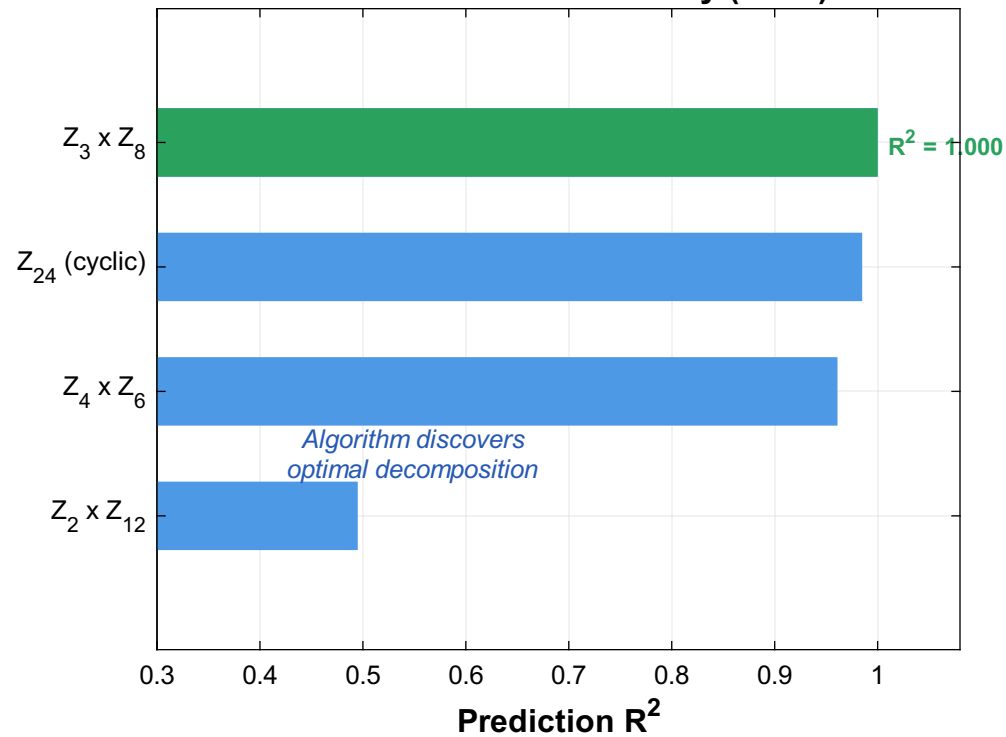

Supplement: Supplementary file 11 [file fig5_discovery.pdf › tensor-group-sym-main/latex/figures/fig5_discovery.pdf]

## Ablation: Removing Symmetry Components

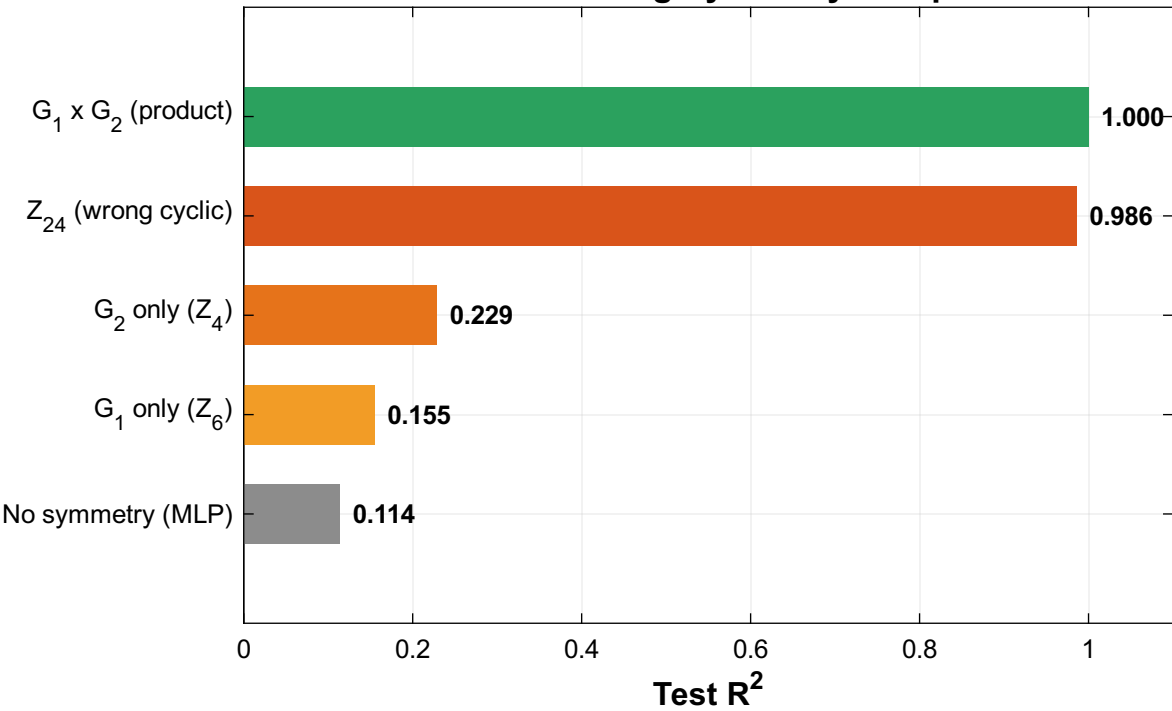

Supplement: Supplementary file 13 [file fig_ablation.pdf › tensor-group-sym-main/latex/figures/fig_ablation.pdf]

# Predicted vs True

a  $\text{star}_G$ -SVD + Ridge ( $R^2 = 1.000$ )

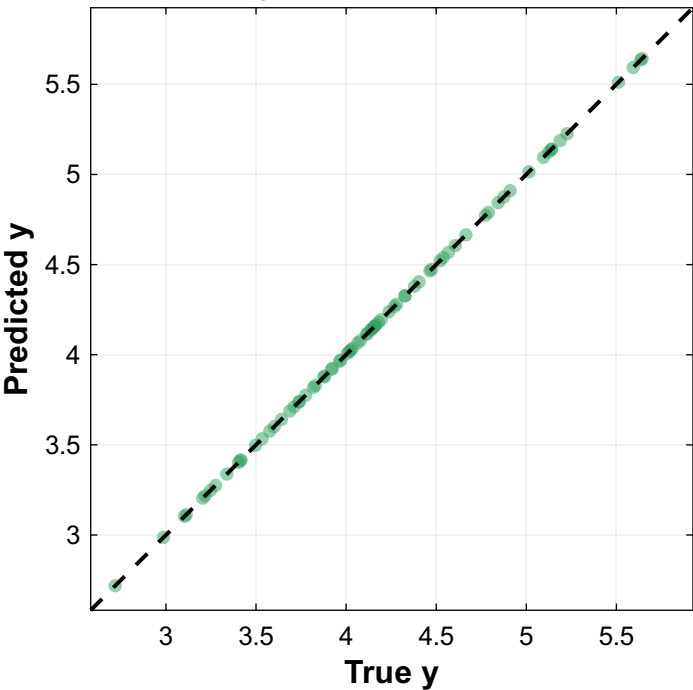

b Standard MLP ( $R^2 = -0.084$ )

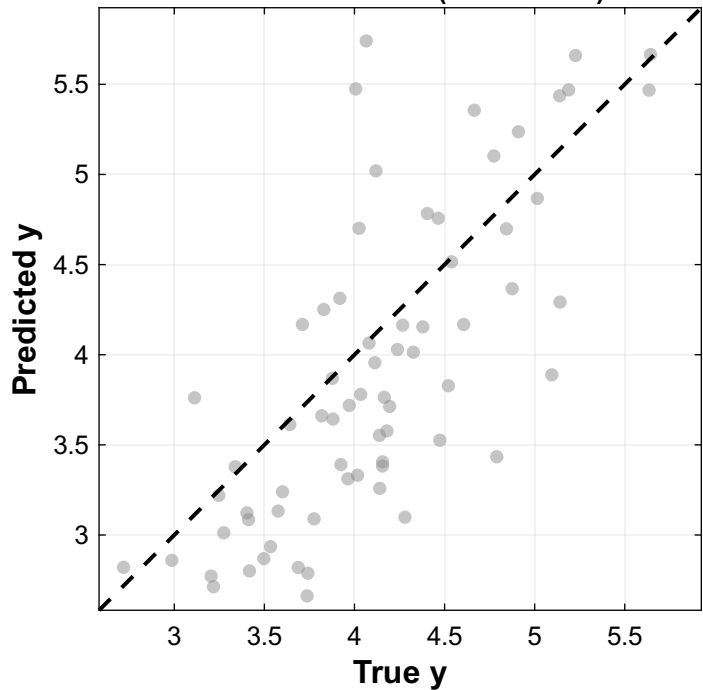

Supplement: Supplementary file 15 [file fig_scatter.pdf › tensor-group-sym-main/latex/figures/fig_scatter.pdf]

# Spectral Fingerprints by Quantum Property

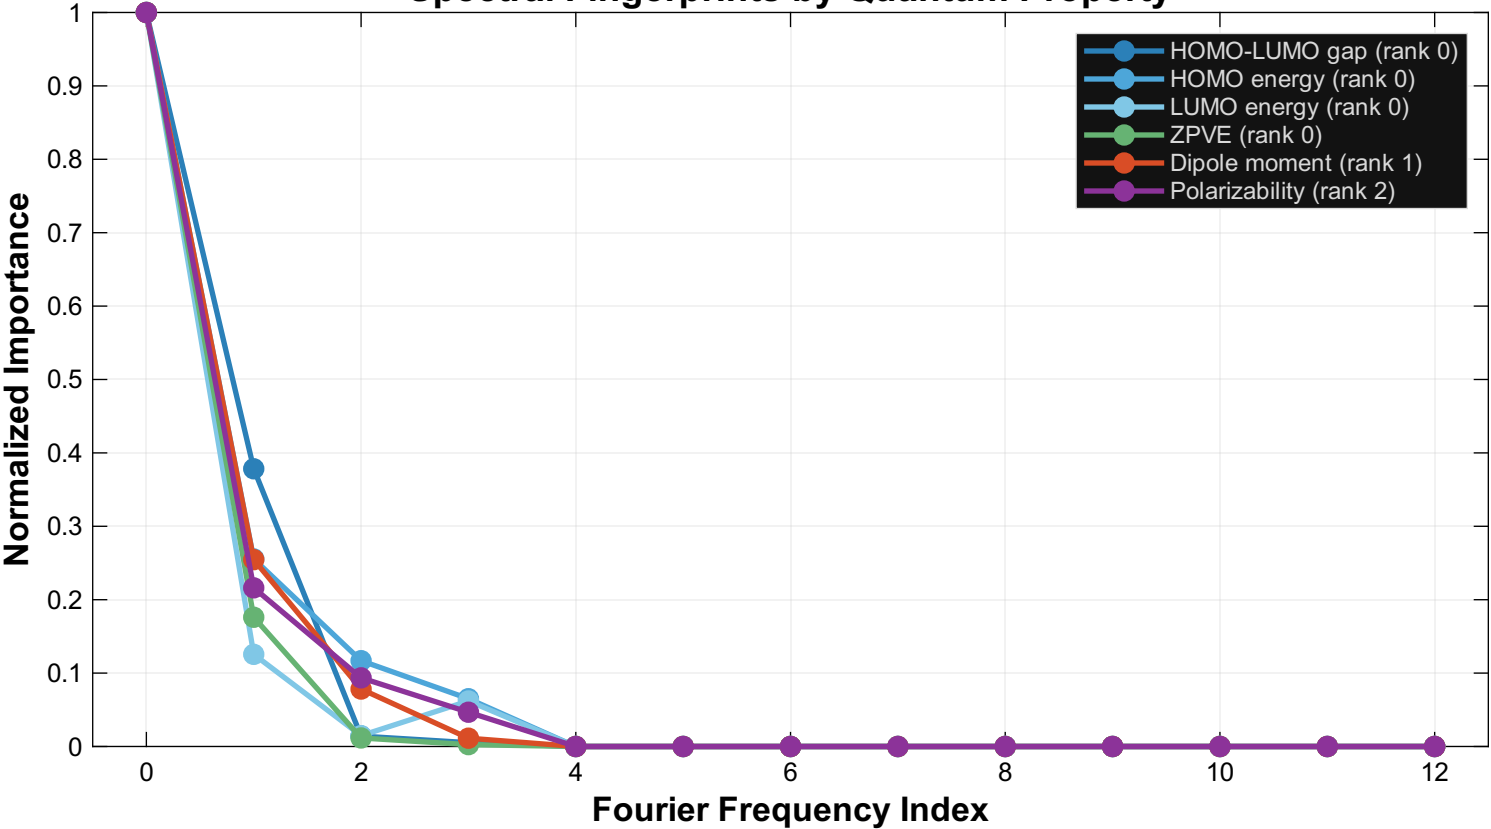

Supplement: Supplementary file 16 [file frequency_profiles.pdf › tensor-group-sym-main/latex/figures/frequency_profiles.pdf]

# Irrep Decomposition of Predictive Power

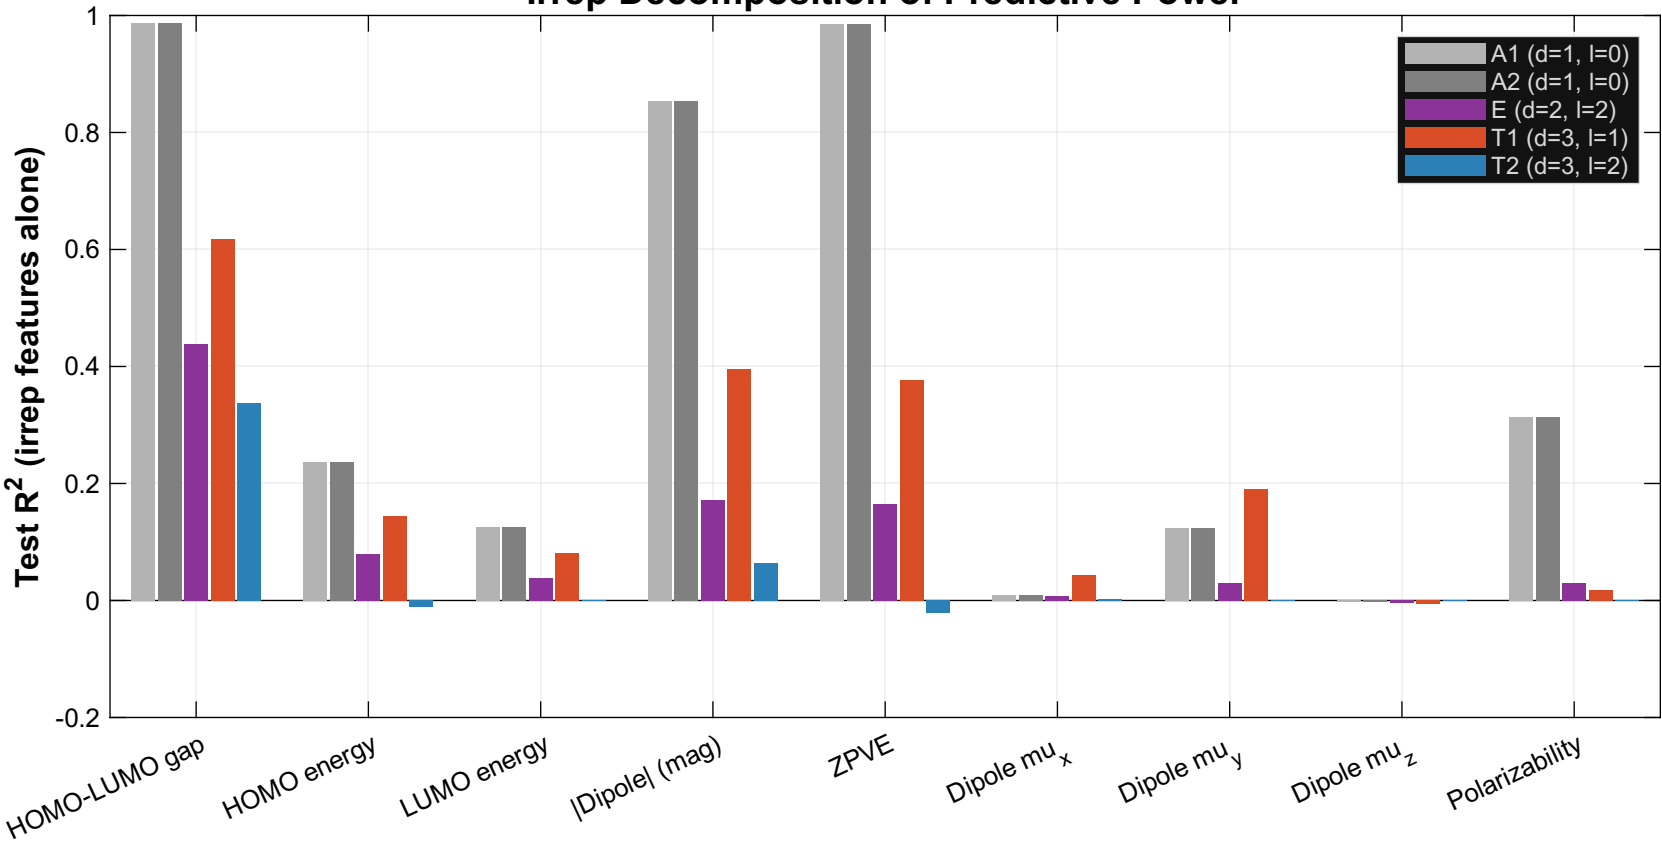

Supplement: Supplementary file 17 [file irrep_bars.pdf › tensor-group-sym-main/latex/figures/irrep_bars.pdf]

Per-Irrep Predictive Power (Octahedral Group)

HOMO-LUMO gap (r=0)

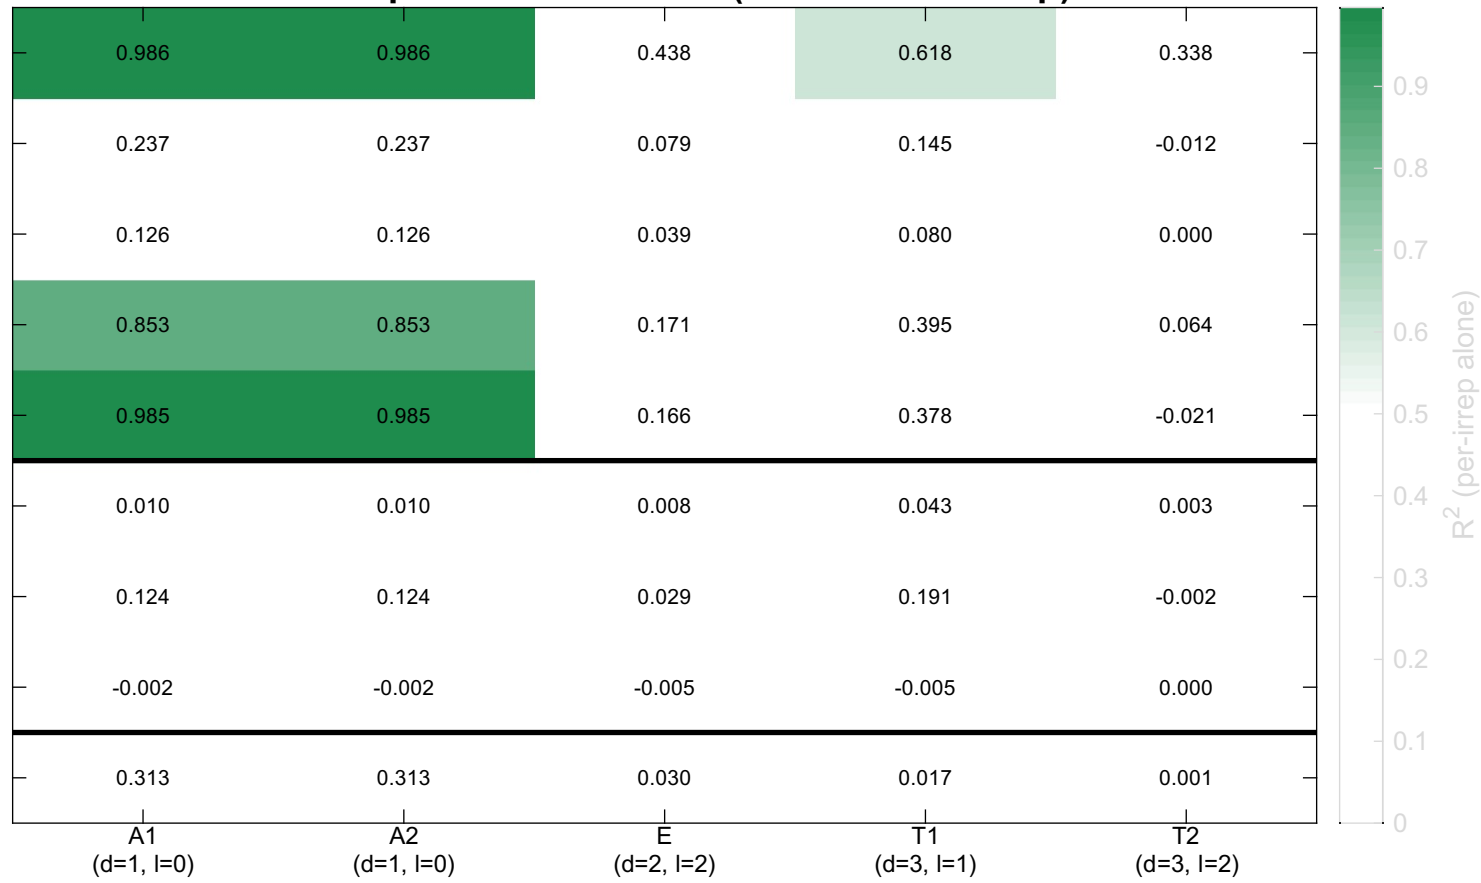

Supplement: Supplementary file 18 [file irrep_heatmap.pdf › tensor-group-sym-main/latex/figures/irrep_heatmap.pdf]

# Standard DFT vs Learned Fourier Basis

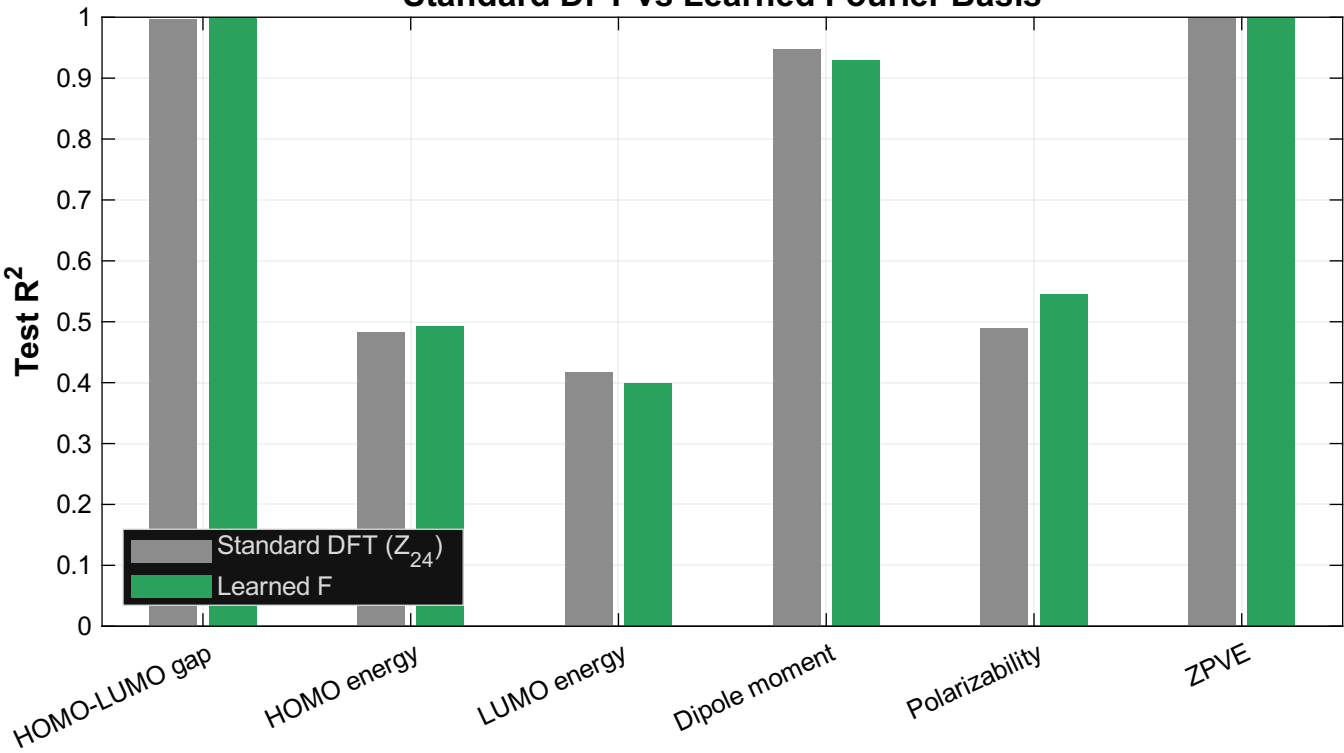

Supplement: Supplementary file 19 [file learned_vs_standard.pdf › tensor-group-sym-main/latex/figures/learned_vs_standard.pdf]

Learning Curves:  $R^2$  vs Sample Size

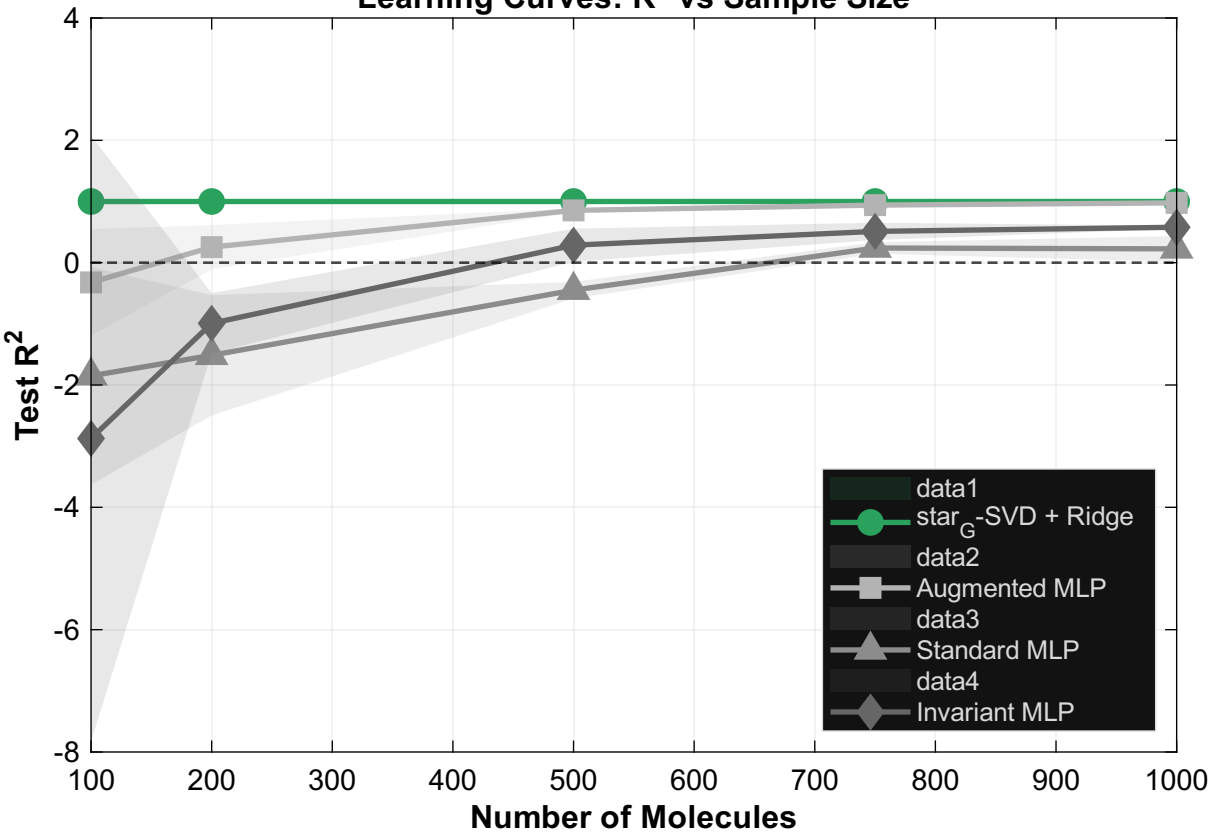

Supplement: Supplementary file 20 [file learning_curves.pdf › tensor-group-sym-main/latex/figures/learning_curves.pdf]

# $R^2$ Decomposition: What Drives Each Property?

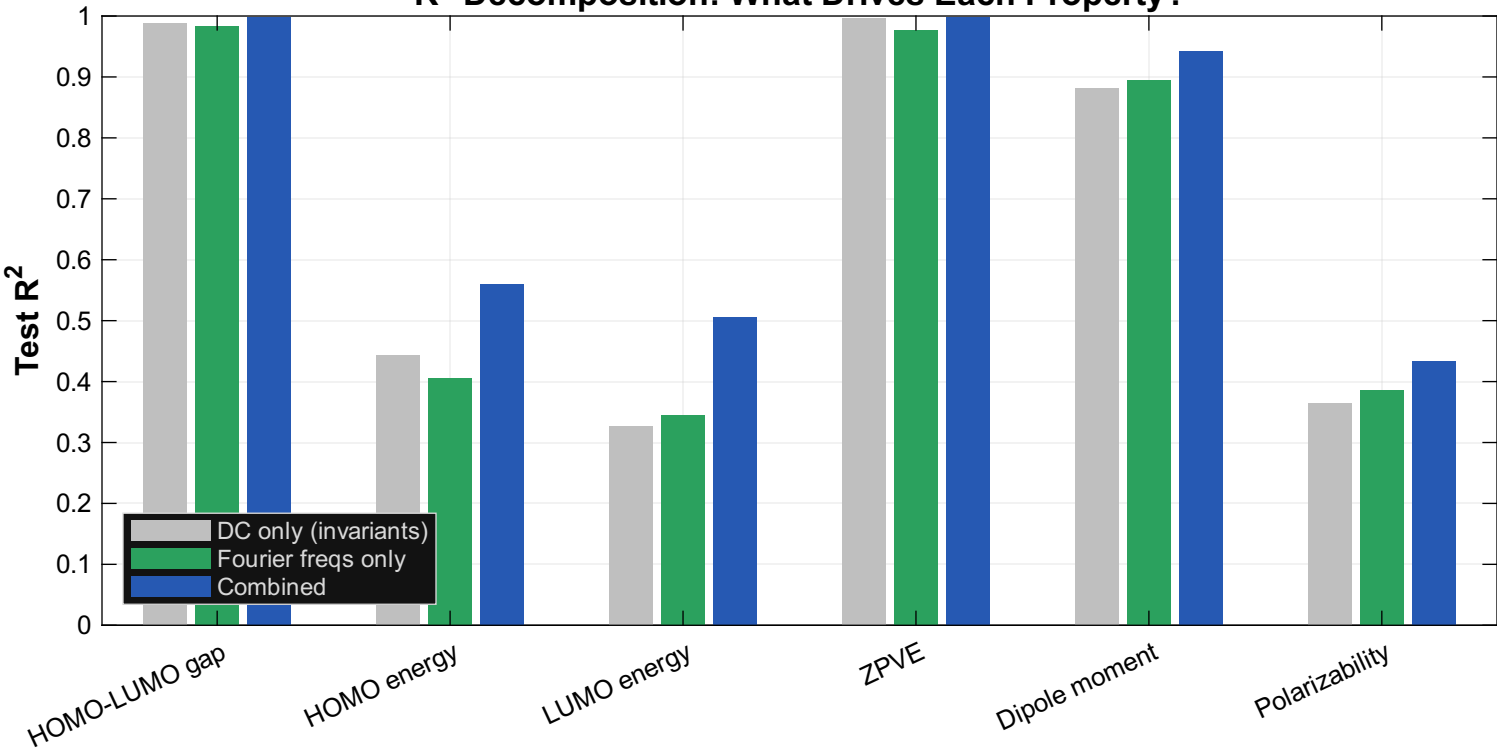

Supplement: Supplementary file 22 [file r2_decomposition.pdf › tensor-group-sym-main/latex/figures/r2_decomposition.pdf]

# Spectral Fingerprint Similarity

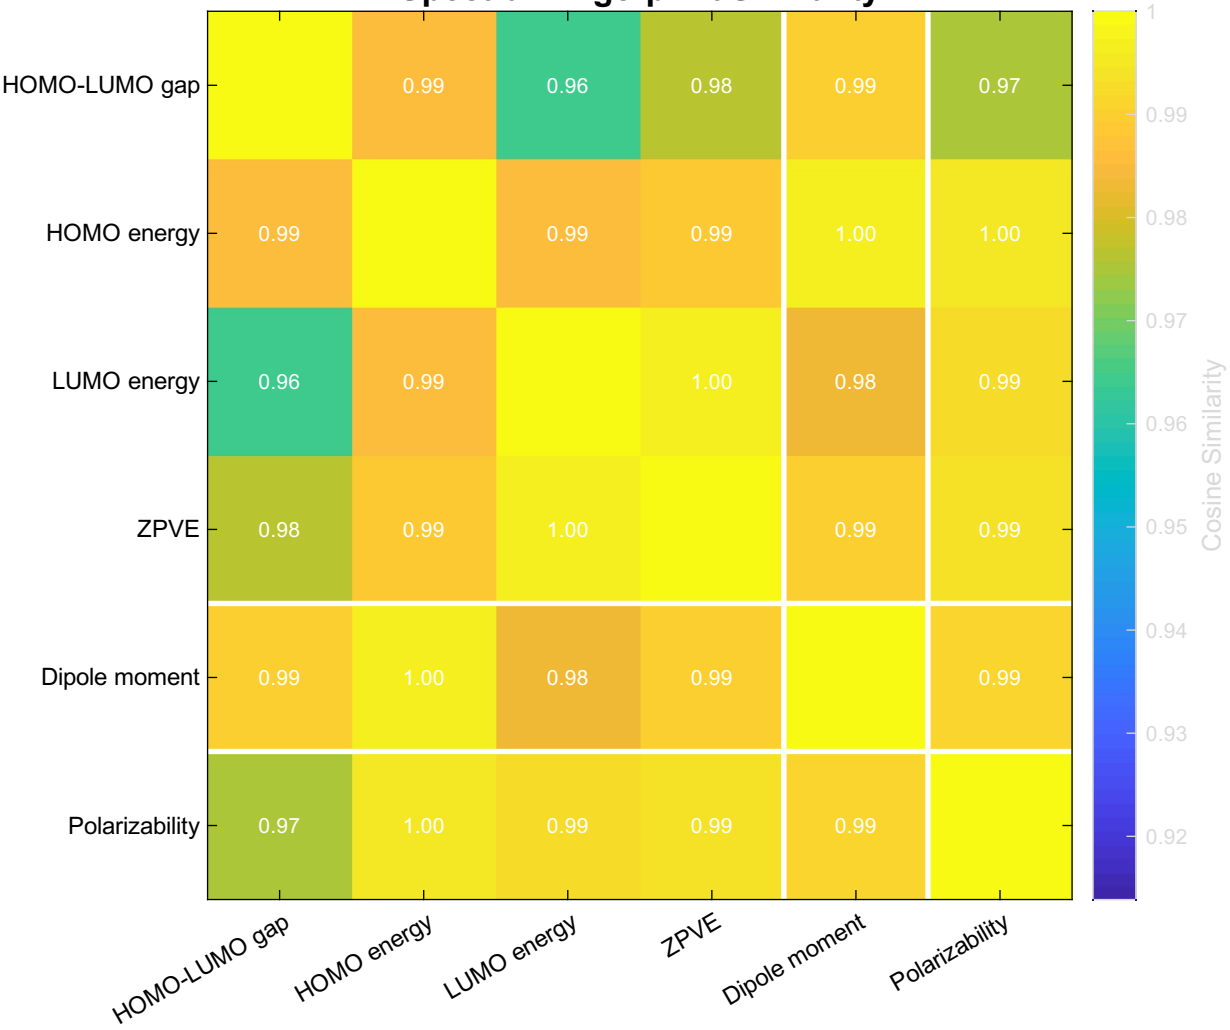

Supplement: Supplementary file 23 [file similarity_matrix.pdf › tensor-group-sym-main/latex/figures/similarity_matrix.pdf]

**a Spectral Fingerprints**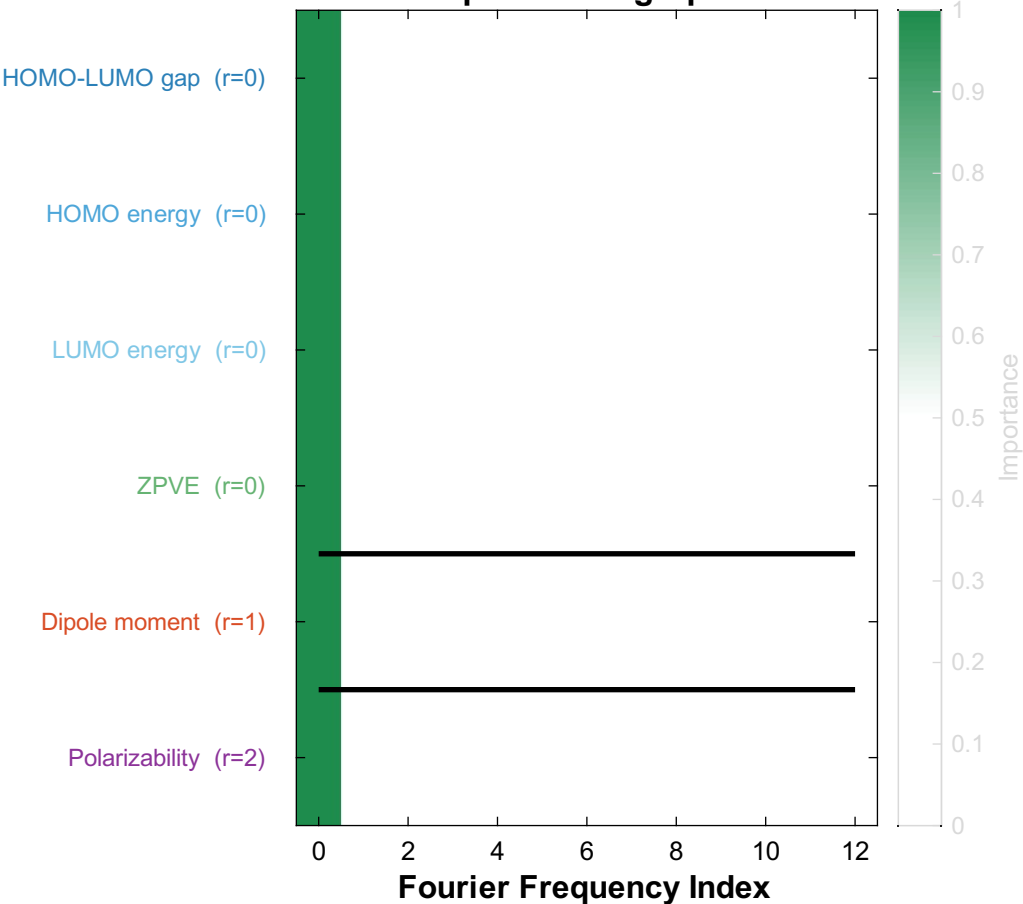**b DC vs Frequency Content**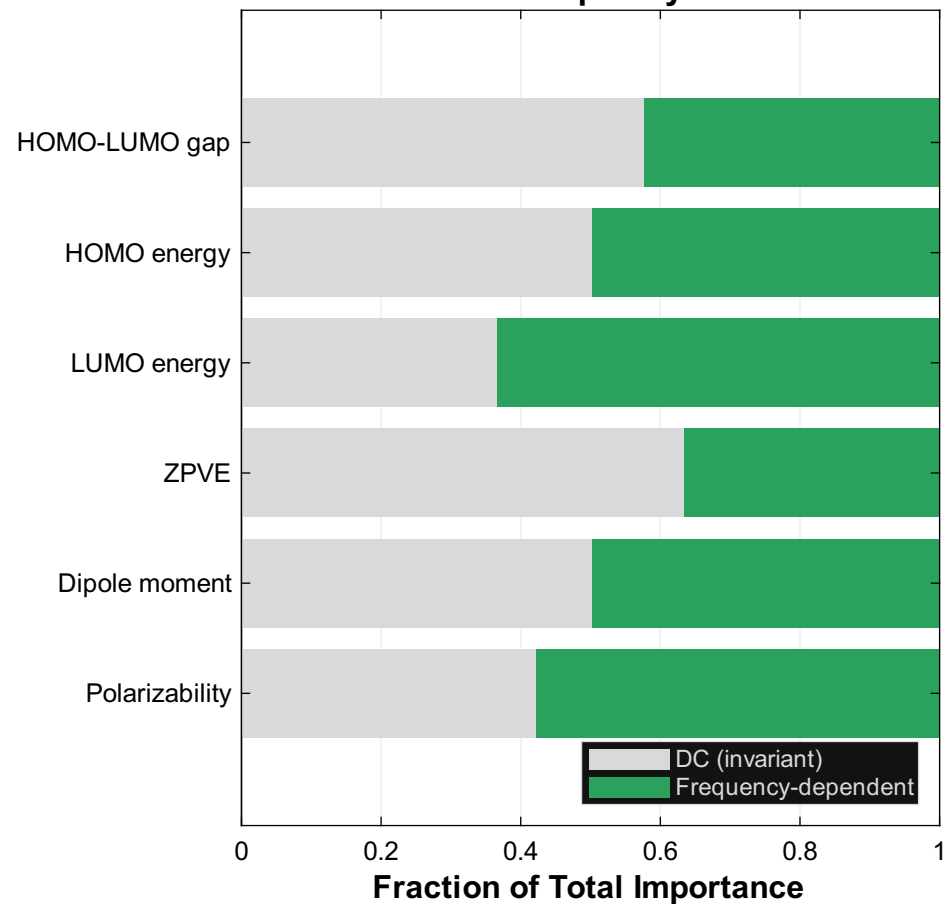

Supplement: Supplementary file 24 [file spectral_fingerprints.pdf › tensor-group-sym-main/latex/figures/spectral_fingerprints.pdf]
